# Supplementary material
Source: PubMed Central journal article supplement (PMC5494633)
Supplement: AEM.00713-17_zam999117941s1.pdf [file AEM.00713-17_zam999117941s1.pdf]

# 1 **Supplemental materials and methods**

## 2 **Growth curve**

3 VC4251 wild type strain and all VC4251-derived gene mutants were cultured  
4 overnight on the LB agar plates at 37°C. Next day, colonies were scraped and  
5 resuspended in PBS with OD<sub>600</sub> value of 1.0. Fifty microliters of bacterial culture was  
6 transferred into 5 ml fresh LB medium and then grown at 28°C, 220rpm. OD<sub>600</sub> values  
7 were determined every hour until the culture reached the stationary phase by using a  
8 UV-visible spectrophotometer (VARIAN). Growth curves were plotted by Graphpad  
9 software. For complementation strains VC4251dmsH(pBADmshA),  
10 VC4251dgbpA(pBADgbpA), VC4251dtcpA(VC4251dtcpA) and  
11 VC4251dlacZ(pBAD), the LB agar plates and LB medium were supplemented with  
12 ampicillin and arabinose to the final concentration of 100 µg/ml and 0.5% respectively  
13 for the culture of these strains. OD<sub>600</sub> values were determined every hour until the  
14 culture reached the stationary phase by using a TECAN infinite M200 PRO detective  
15 instrument.

## 16 **Growth and bioluminescence value curve of wild type strain and mutants** 17 **carrying the pXEN-pmdh-luxCDABE plasmid**

18 Bioluminescent-labeled VC4251 wild type strain and VC4251-derived *mshA*,  
19 *gbpA*, *tcpA* mutant bioluminescent strains were cultured overnight on the LB agar plates  
20 containing 100 µg/ml ampicillin at 37°C. Next day, strains were scraped and  
21 resuspended in PBS containing 100 µg/ml ampicillin with OD<sub>600</sub> value of 1.0. Fifty

22 microliters of bacterial culture was transferred into 5 ml fresh LB medium containing  
23 100 µg/ml ampicillin, and then grown at 28°C, 220rpm. OD<sub>600</sub> values and the  
24 bioluminescence values were determined every hour until the culture reached the  
25 stationary phase by using a TECAN infinite M200 PRO detective instrument which  
26 could detect both OD<sub>600</sub> value and the bioluminescence value simultaneously. Growth  
27 curves and the bioluminescence value curve were plotted by Graphpad software.

28

29

30 **Supplemental Figure**

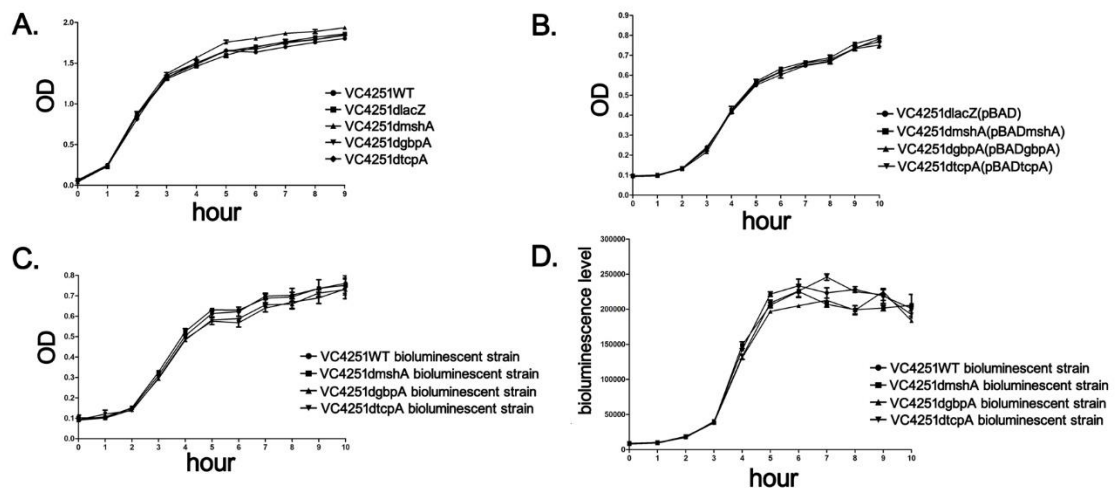

31

32 **Supplemental Figure 1. Growth curves and bioluminescence value curves of wild**  
33 **type strain VC4251, its mutants, complementary strains and bioluminescent**  
34 **strains.**

35 A. Growth curve of strains VC4251, VC4251dmshA, VC4251dgbpA, VC4251dtcpA  
36 and VC4251dlacZ in LB media (using a UV-visible spectrophotometer, VARIAN). B.  
37 Growth curve of complementary strains VC4251dlacZ(pBAD),  
38 VC4251dmshA(pBADmshA), VC4251dgbpA(pBADgbpA) and  
39 VC4251dtcpA(pBADtcpA) in LB media supplemented with 100 µg/ml ampicillin and  
40 0.5% arabinose. C. Growth curve of strains VC4251, VC4251dmshA, VC4251dgbpA  
41 and VC4251dtcpA carrying pXEN-pmdh-luxCDABE plasmid in LB media containing  
42 100 µg/ml ampicillin (using a TECAN Infinite M200 PRO multimode microplate  
43 reader). D. Bioluminescence of strains VC4251, VC4251dmshA, VC4251dgbpA and  
44 VC4251dtcpA carrying pXEN-pmdh-luxCDABE in LB media containing 100 µg/ml  
45 ampicillin (using a TECAN Infinite M200 PRO).
